# Supplementary material for: Seven interferon gamma response genes serve as a prognostic risk signature that correlates with immune infiltration in lung adenocarcinoma
Source: PubMed Central journal article supplement (PMC8109098; doi:10.18632/aging.202831), 2021-04-04
Supplement: aging-13-202831-s002.pdf [file aging-13-202831-s002.pdf]

## SUPPLEMENTARY TABLES

**Supplementary Table 1. Clinical features of two LUAD cohorts.**

|                    | <b>Death (N=154)</b> | <b>alive (N=322)</b> | <b>Overall (N=476)</b> |
|--------------------|----------------------|----------------------|------------------------|
| <b>Gender</b>      |                      |                      |                        |
| Male               | 75 (48.7%)           | 144 (44.7%)          | 219 (46.0%)            |
| Female             | 79 (51.3%)           | 178 (55.3%)          | 257 (54.0%)            |
| <b>Age (years)</b> |                      |                      |                        |
| Mean (SD)          | 65.7 (10.7)          | 65.0 (9.69)          | 65.2 (10.0)            |
| Median [Min, Max]  | 67.0 [40.0, 88.0]    | 66.0 [33.0, 87.0]    | 66.0 [33.0, 88.0]      |
| <b>Stage</b>       |                      |                      |                        |
| I                  | 53 (34.4%)           | 206 (64.0%)          | 259 (54.4%)            |
| II                 | 46 (29.9%)           | 70 (21.7%)           | 116 (24.4%)            |
| III                | 42 (27.3%)           | 37 (11.5%)           | 79 (16.6%)             |
| IV                 | 13 (8.4%)            | 9 (2.8%)             | 22 (4.6%)              |
| <b>T</b>           |                      |                      |                        |
| T1                 | 39 (25.3%)           | 123 (38.2%)          | 162 (34.0%)            |
| T2                 | 87 (56.5%)           | 168 (52.2%)          | 255 (53.6%)            |
| T3                 | 18 (11.7%)           | 24 (7.5%)            | 42 (8.8%)              |
| T4                 | 10 (6.5%)            | 7 (2.2%)             | 17 (3.6%)              |

(a) Clinical features of the TCGA LUAD cohort.

|                    | <b>Death (N=109)</b> | <b>alive (N=280)</b> | <b>Total (N=389)</b> |
|--------------------|----------------------|----------------------|----------------------|
| <b>Gender</b>      |                      |                      |                      |
| Male               | 58 (53.2%)           | 114 (40.7%)          | 172 (44.2%)          |
| Female             | 51 (46.8%)           | 166 (59.3%)          | 217 (55.8%)          |
| <b>Age (years)</b> |                      |                      |                      |
| Mean (SD)          | 70.4 (8.54)          | 69.1 (9.75)          | 69.5 (9.43)          |
| Median [Min, Max]  | 72.0 [46.0, 85.0]    | 70.0 [38.0, 89.0]    | 70.0 [38.0, 89.0]    |
| <b>Stage</b>       |                      |                      |                      |
| I                  | 51 (46.8%)           | 201 (71.8%)          | 252 (64.8%)          |
| II                 | 24 (22.0%)           | 41 (14.6%)           | 65 (16.7%)           |
| III                | 26 (23.9%)           | 31 (11.1%)           | 57 (14.7%)           |
| IV                 | 8 (7.3%)             | 7 (2.5%)             | 15 (3.9%)            |
| <b>KRAS</b>        |                      |                      |                      |
| Wildtype           | 64 (58.7%)           | 190 (67.9%)          | 254 (65.3%)          |
| Mutation           | 45 (41.3%)           | 90 (32.1%)           | 135 (34.7%)          |
| <b>EGFR</b>        |                      |                      |                      |
| Wildtype           | 105 (96.3%)          | 244 (87.1%)          | 349 (89.7%)          |
| Mutation           | 4 (3.7%)             | 36 (12.9%)           | 40 (10.3%)           |
| <b>STK11</b>       |                      |                      |                      |
| Wildtype           | 91 (83.5%)           | 234 (83.6%)          | 325 (83.5%)          |
| Mutation           | 18 (16.5%)           | 46 (16.4%)           | 64 (16.5%)           |
| <b>TP53</b>        |                      |                      |                      |
| Wildtype           | 80 (73.4%)           | 215 (76.8%)          | 295 (75.8%)          |
| Mutation           | 29 (26.6%)           | 65 (23.2%)           | 94 (24.2%)           |

(b) Clinical features of the GSE72094 LUAD cohort.

**Supplementary Table 2. Analysis of 24 significantly differentially expressed interferon gamma response genes in the TCGA LUAD cohort.**

| <b>Gene</b> | <b>conMean</b> | <b>treatMean</b> | <b>logFC</b> | <b>pValue</b> | <b>change</b> |
|-------------|----------------|------------------|--------------|---------------|---------------|
| CD69        | 8.936670479    | 4.47653308       | -0.997355581 | 3.19E-12      | Down          |
| CD74        | 1897.142334    | 1258.20791       | -0.592457585 | 3.76E-10      | Down          |
| CD86        | 9.607033362    | 6.223707114      | -0.626316828 | 4.52E-10      | Down          |
| CDKN1A      | 71.73071206    | 41.03490112      | -0.805739475 | 6.18E-07      | Down          |
| CIITA       | 5.058851136    | 4.29529146       | -0.236053757 | 0.00187674    | Down          |
| CSF2RB      | 9.875387254    | 5.517276061      | -0.839881155 | 7.30E-15      | Down          |
| IL10RA      | 9.701275787    | 6.926449937      | -0.486058378 | 2.96E-07      | Down          |
| IRF8        | 10.10959639    | 5.46877443       | -0.88643594  | 2.31E-15      | Down          |
| LATS2       | 10.7276258     | 5.178535474      | -1.050714763 | 1.56E-23      | Down          |
| LCP2        | 8.387419434    | 6.207701793      | -0.434167749 | 4.55E-08      | Down          |
| MT2A        | 171.2990976    | 107.9445696      | -0.666226884 | 0.000272554   | Down          |
| NOD1        | 4.764992505    | 4.034663216      | -0.240025692 | 1.65E-05      | Down          |
| PTPN6       | 21.23585905    | 15.13571205      | -0.488545923 | 6.81E-08      | Down          |
| SELP        | 10.56550028    | 2.27969876       | -2.212445977 | 1.03E-29      | Down          |
| SOD2        | 31.28827632    | 26.96227591      | -0.214679901 | 0.009578905   | Down          |
| IRF4        | 1.273380295    | 2.803021931      | 1.138319688  | 0.00081257    | Up            |
| ITGB7       | 1.223934115    | 1.669670931      | 0.448037896  | 0.03900192    | Up            |
| NMI         | 7.067112293    | 9.363642417      | 0.405949008  | 9.72E-05      | Up            |
| OAS3        | 8.38112837     | 16.96725326      | 1.017536638  | 1.93E-08      | Up            |
| PFKP        | 7.575956699    | 36.9750878       | 2.287053583  | 1.61E-24      | Up            |
| PNP         | 11.79940954    | 15.63021418      | 0.405622882  | 1.59E-05      | Up            |
| RBCK1       | 21.51999684    | 26.09297107      | 0.27798336   | 0.001820364   | Up            |
| RIPK2       | 7.642719185    | 10.60564426      | 0.472674335  | 0.000781467   | Up            |
| TRAFD1      | 13.22724719    | 16.44497774      | 0.314134211  | 3.75E-05      | Up            |

Differential gene expression was analyzed using the 'limma' R package. Information, including gene name, mean gene expression in normal (conMean) or cancer (treatMean) samples, log fold change (logFC) of cancer vs. normal, p value (pValue) of logFC, and gene expression change pattern in cancer, were listed in the table.
